# Supplementary material
Source: PubMed Central journal article supplement (PMC2278210)

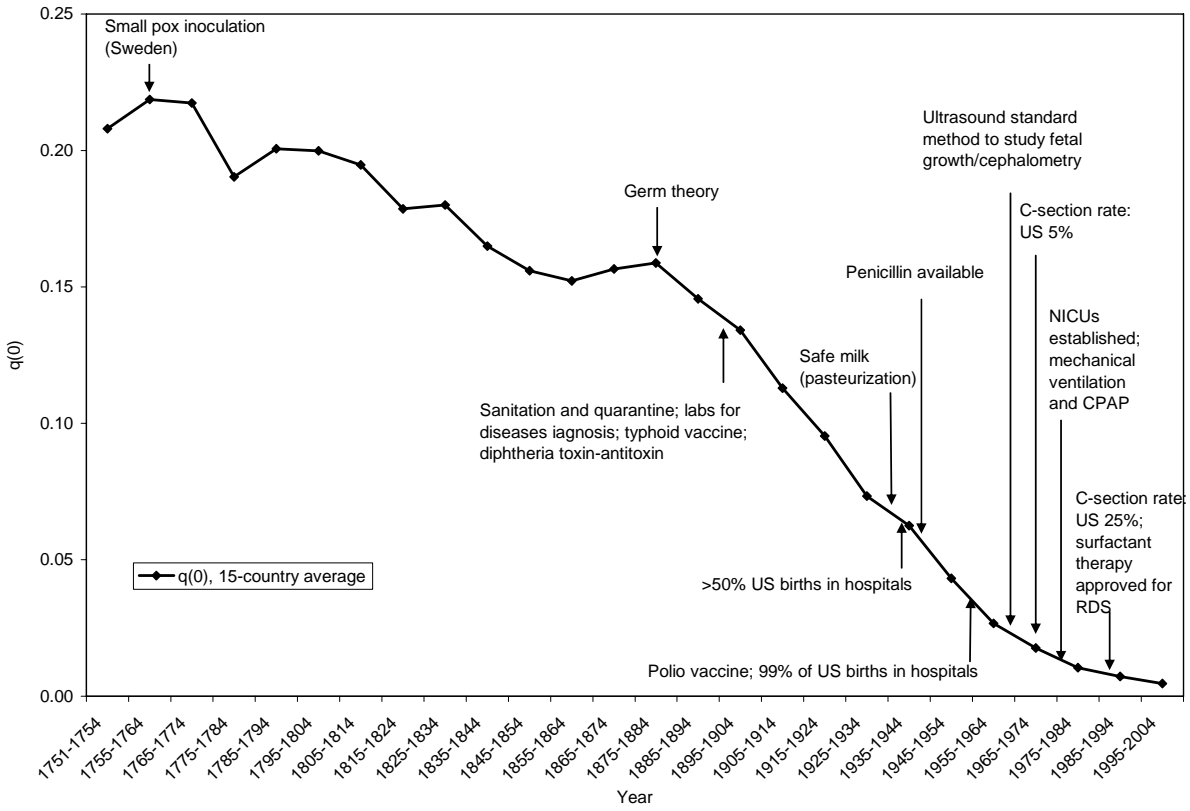

Supplement: pnas_0800221105_1.pdf [file pnas_0800221105_1.pdf]

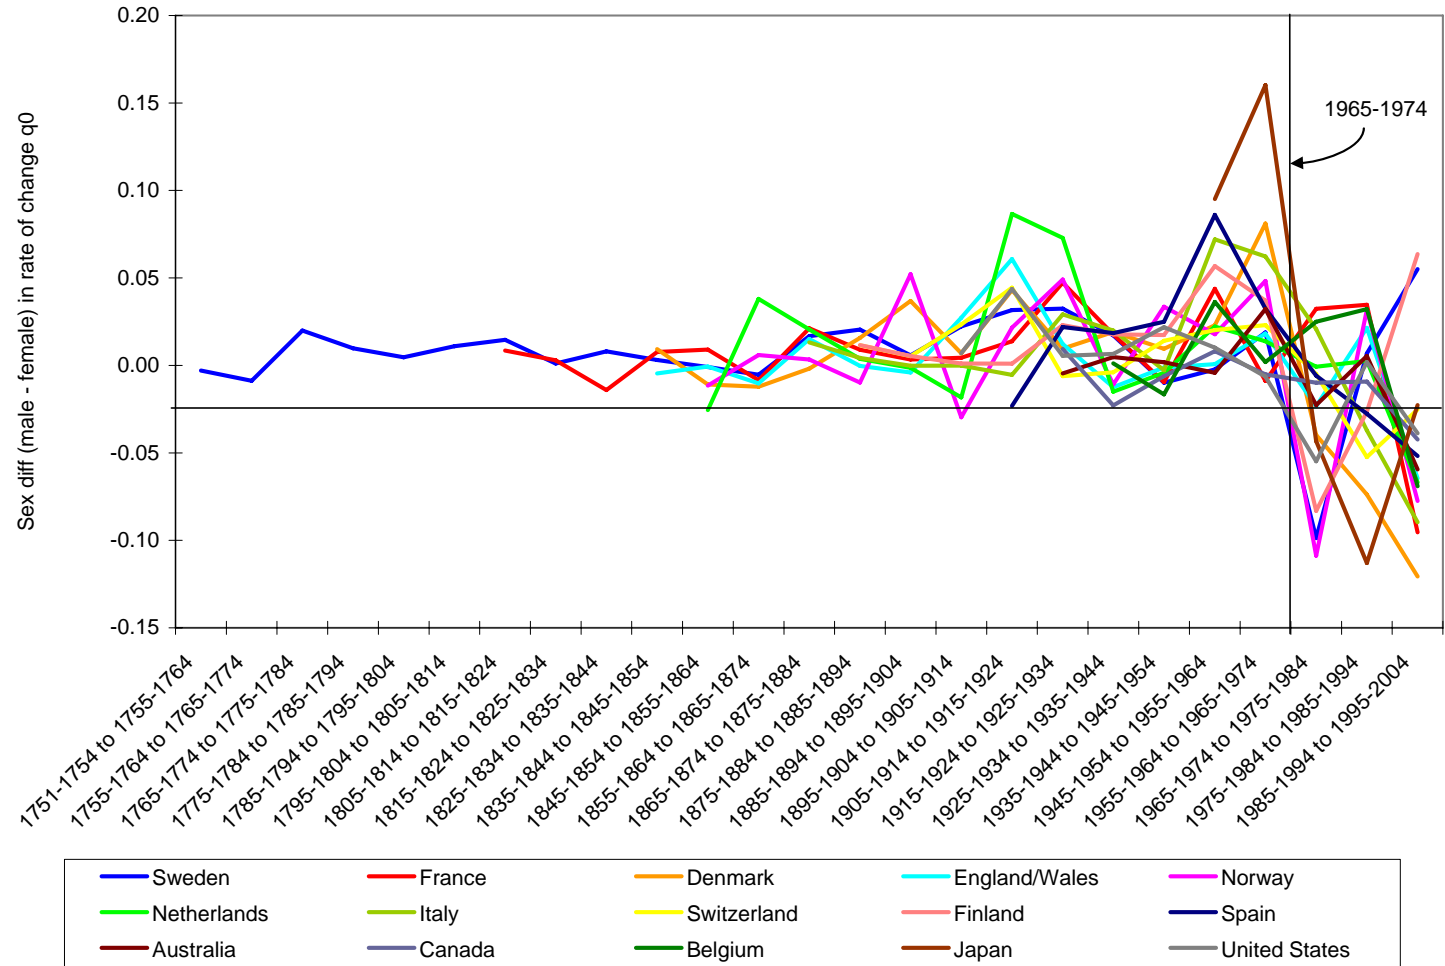

Supplement: pnas_0800221105_2.pdf [file pnas_0800221105_2.pdf]
